# Supplementary material for: Emerging Applications of NLP and Large Language Models in Gastroenterology and Hepatology: A Systematic Review
Source: bioRxiv or medRxiv preprint supplement (doi:10.1101/2024.06.26.24309567), 2024-06-27
Supplement: Supplementary file [file media-1.pdf]

**Table 1: Summary of the included studies.**

| <b>author</b>           | <b>Year</b> | <b>Data Type + Sample Size</b>              | <b>Model</b>                              | <b>Model Task</b>                        | <b>Main Result</b>                                             |
|-------------------------|-------------|---------------------------------------------|-------------------------------------------|------------------------------------------|----------------------------------------------------------------|
| <b>Gastroenterology</b> |             |                                             |                                           |                                          |                                                                |
| <b>Kong et al.</b>      | 2024        | 15 questions related to H. pylori           | ChatGPT 4.0, ChatGPT 3.5, ERNIE Bot 4.0   | Counseling on H. pylori infection        | Satisfactory accuracy and comprehensibility; low completeness  |
| <b>Lahat et al.</b>     | 2023        | 110 real-life patient questions             | GPT                                       | Answering patient questions              | Varied performance in accuracy and clarity                     |
| <b>Truhn et al.</b>     | 2024        | 100 colorectal cancer reports               | GPT-4                                     | Extracting structured information        | High accuracy in extraction of cancer stages                   |
| <b>Zhou et al.</b>      | 2023        | NR                                          | GPT-3.5 and GPT-4                         | Medical consultation and report analysis | High effectiveness in consultation accuracy                    |
| <b>Choo et al.</b>      | 2024        | 30 patients with advanced colorectal cancer | GPT                                       | Formulating management plans             | High concordance with multidisciplinary team plans             |
| <b>Huo et al.</b>       | 2024        | Responses for nine patient cases            | ChatGPT, Bing Chat, Google Bard, Claude 2 | Providing screening recommendations      | Variable advice quality, some aligned with clinical guidelines |
| <b>Imler et al.</b>     | 2013        | 500 colonoscopy and pathology reports       | cTAKES NLP engine                         | Categorizing pathology findings          | High accuracy in identifying pathology levels                  |

|                          |      |                                                       |                                                                 |                                                |                                                             |
|--------------------------|------|-------------------------------------------------------|-----------------------------------------------------------------|------------------------------------------------|-------------------------------------------------------------|
| <b>Lim et al.</b>        | 2024 | 62 example case scenarios, tested three times         | GPT-4                                                           | Providing advice on colonoscopy intervals      | Consistent high adherence to guidelines                     |
| <b>Imler et al.</b>      | 2014 | 10,798 colonoscopy reports, 6,379 linked to pathology | Clinical text analysis and knowledge extraction system (cTAKES) | Determining colonoscopy surveillance intervals | High agreement with standards, improved guideline adherence |
| <b>Bae et al.</b>        | 2022 | 2,425 colonoscopy and pathology reports               | Regular expressions and smartTA                                 | Assessing quality indicators                   | High accuracy and matching expert review                    |
| <b>Denny et al.</b>      | 2012 | 200 patients                                          | KnowledgeMap Concept Identifier                                 | Identifying colorectal cancer tests in EMRs    | Superior recall compared to manual and billing records      |
| <b>Lahat et al.</b>      | 2023 | 20 research questions                                 | GPT                                                             | Generating gastroenterology research questions | Relevant and clear questions generated, low originality     |
| <b>Laique et al.</b>     | 2021 | 35,914 colonoscopy reports                            | Optical Character Recognition (OCR) and NLP                     | Extracting quality metrics                     | High accuracy in detecting clinical variables               |
| <b>Blumenthal et al.</b> | 2015 | 1,531 patients                                        | NLP tool called QPID                                            | Predicting non-adherence to colonoscopy        | Effective prediction supported by Non-Adherence Ratio       |
| <b>Harkema et al.</b>    | 2011 | 679 colonoscopy and pathology reports                 | Rule-based NLP engine                                           | Quality measurement in colonoscopy             | High accuracy in automated quality assessment               |

|                             |      |                               |                                 |                                                        |                                                              |
|-----------------------------|------|-------------------------------|---------------------------------|--------------------------------------------------------|--------------------------------------------------------------|
| <b>Raju et al.</b>          | 2015 | 12,748 colonoscopy patients   | Custom NLP software             | Reporting colonoscopy quality metrics                  | Comparable to manual methods, high ADR detection             |
| <b>Nayor et al.</b>         | 2018 | 8,032 screening colonoscopies | NLP pipeline                    | Calculating adenoma and serrated polyp detection rates | Perfect precision and recall                                 |
| <b>Atarere et al.</b>       | 2024 | 20 questions using AI models  | ChatGPT, BingChat, and YouChat™ | CRC screening advice                                   | High inter-rater reliability, variable accuracy              |
| <b>Seong et al.</b>         | 2023 | 280,668 colonoscopy reports   | LSTM, BioBERT, Bi-LSTM-CRF      | Extracting information from reports                    | Superior performance in extracting colonoscopic findings     |
| <b>Lee et al.</b>           | 2019 | 800 colonoscopy reports       | Commercial NLP tool             | Identifying quality and large polyps                   | High sensitivity and specificity in data extraction          |
| <b>Denny et al.</b>         | 2010 | 200 patients                  | KnowledgeMap concept identifier | Detecting colonoscopy timing and status                | High recall and precision, improved scheduling               |
| <b>Parthasarathy et al.</b> | 2020 | 323,494 colonoscopy patients  | NLP                             | Diagnosing serrated polyposis syndrome                 | High accuracy in identifying SPS, improved detection rates   |
| <b>Rammohan et al.</b>      | 2024 | NR                            | GPT-4 and Bard                  | Answering standard gastroenterology questions          | ChatGPT 4.0 more reliable and accurate than Bard             |
| <b>Pereyra et al.</b>       | 2024 | 238 physicians                | GPT-3.5                         | Assessing CRC screening recommendations                | Lower performance compared to physicians, variable responses |
| <b>Song et al.</b>          | 2022 | 1,000 validation, 248,966     | Custom NLP pipeline             | Extracting information from EGD reports                | High sensitivity, precision, and accuracy in data extraction |

|                           |      |                                                        |                                   |                                        |                                                                  |
|---------------------------|------|--------------------------------------------------------|-----------------------------------|----------------------------------------|------------------------------------------------------------------|
|                           |      | application EGD reports                                |                                   |                                        |                                                                  |
| <b>Peng et al.</b>        | 2024 | 131 colorectal cancer questions                        | GPT-3.5                           | Answering CRC-related questions        | High reproducibility, less comprehensive than expert answers     |
| <b>Tinmouth et al.</b>    | 2023 | 1,450 pathology reports                                | NLP                               | Identifying adenomas for ADR           | High accuracy, supported system-level ADR measurement            |
| <b>Mehrotra et al.</b>    | 2012 | 24,157 colonoscopy reports                             | NLP (C-QUAL)                      | Assessing colonoscopy quality measures | Identified variability in provider performance                   |
| <b>Becker et al.</b>      | 2019 | 2,513 German clinical notes from 500 patients          | German-specific NLP pipeline      | Guideline-based treatment evaluation   | High precision and recall in extracting treatment information    |
| <b>Hou et al.</b>         | 2013 | 575 colonoscopy pathology reports                      | Automated Retrieval Console (ARC) | Identifying surveillance colonoscopy   | Effective in classifying surveillance colonoscopy                |
| <b>Gorelik et al.</b>     | 2023 | 20 clinical scenarios                                  | GPT-4                             | Post-colonoscopy patient management    | High compliance with guidelines, accurate recommendations        |
| <b>Samaan et al.</b>      | 2023 | 91 questions on liver cirrhosis                        | GPT                               | Answering cirrhosis-related questions  | Lower accuracy in Arabic, significant discrepancies              |
| <b>Cankurtaran et al.</b> | 2023 | 20 questions on Crohn's disease and ulcerative colitis | GPT                               | Responding to IBD queries              | Higher reliability in professional context, variable in patients |

|                         |      |                                          |                                    |                                                    |                                                                       |
|-------------------------|------|------------------------------------------|------------------------------------|----------------------------------------------------|-----------------------------------------------------------------------|
| <b>Wenker et al.</b>    | 2023 | 1,000 patients for NLP validation        | CLAMP NLP software                 | Identifying dysplasia in Barrett's Esophagus       | High accuracy, sensitivity, and precision in dysplasia identification |
| <b>Imler et al.</b>     | 2018 | 23,674 ERCP procedures                   | NLP                                | Quality measurement for ERCP                       | High accuracy and precision in identifying quality measures           |
| <b>Li et al.</b>        | 2021 | 5,570 patients                           | NLP                                | Identifying Lynch Syndrome for MMR screening       | High accuracy in classifying MMR IHC results                          |
| <b>Li et al.</b>        | 2022 | 22,206 patients across various tests     | ENDOANGEL-AS NLP and deep learning | Identifying high-risk patients for surveillance    | High accuracy in patient identification and risk classification       |
| <b>Waghlikar et al.</b> | 2012 | 53 patients                              | NLP                                | Providing colonoscopy surveillance guidance        | High effectiveness in clinical decision support                       |
| <b>Sciberras et al.</b> | 2024 | 38 questions from IBD patients           | GPT-3.5                            | Generating responses to IBD patient queries        | High accuracy and moderate completeness                               |
| <b>Stidham et al.</b>   | 2023 | 1,240 patients with IBD                  | NLP                                | Detecting and inferring EIM activity status        | High effectiveness in improving disease management                    |
| <b>Ganguly et al.</b>   | 2023 | 2,276 colonoscopy procedures             | NLP                                | Adenoma detection and report card generation       | High sensitivity, specificity, and consistency                        |
| <b>Ma et al.</b>        | 2024 | 165 esophageal ESD cases                 | GPT-3.5                            | Post-procedural quality control for esophageal ESD | Improved efficiency and accuracy in quality assessments               |
| <b>Gravina et al.</b>   | 2024 | Questions from 2023 Italian medical exam | GPT 3.5 and Perplexity AI          | Answering medical residency exam questions         | High accuracy in exam responses, educational potential                |
| <b>Fevrier et al.</b>   | 2020 | 401,566 colonoscopy linked               | SAS® PERL NLP tool                 | Extracting data from colonoscopy reports           | High performance in classifying key clinical variables                |

|                               |      |                                                      |                                      |                                                                 |                                                               |
|-------------------------------|------|------------------------------------------------------|--------------------------------------|-----------------------------------------------------------------|---------------------------------------------------------------|
|                               |      | with pathology reports                               |                                      |                                                                 |                                                               |
| <b>Benson et al.</b>          | 2023 | 24,584 pathology reports                             | NLP pipeline                         | Extracting features of colorectal polyps                        | High precision and efficiency in feature extraction           |
| <b>Zand et al.</b>            | 2020 | 16,453 lines of dialog from 424 patients             | NLP model                            | Developing a chatbot for IBD patient support                    | Effective in categorizing patient dialog                      |
| <b>Ananthakrishnan et al.</b> | 2013 | 1,200 patients for Crohn's and UC                    | NLP techniques                       | Improving EMR case definitions for IBD                          | Enhanced sensitivity and predictive value in identifying IBD  |
| <b>Wang et al.</b>            | 2024 | 200 medical discharge summaries                      | GPT-4                                | Classifying GI bleeding events                                  | High accuracy, outperforms ICD coding                         |
| <b>Hepatology</b>             |      |                                                      |                                      |                                                                 |                                                               |
| <b>Benedicenti et al.</b>     | 2023 | 56 gastroenterologists, 25 residents, 31 specialists | GPT-3                                | Answering clinical vignettes on Hepatology and Gastroenterology | Demonstrated improvement over time, underperformed vs. humans |
| <b>Li et al.</b>              | 2023 | 1,463 postoperative colorectal cancer patients       | NLP and machine learning integration | Predicting liver metastases                                     | High accuracy in risk prediction                              |
| <b>Wang et al.</b>            | 2022 | LiverTox database                                    | DeepCausality framework              | Causal inference for drug-induced liver injury                  | High accuracy and concordance with clinical guidelines        |
| <b>Yeo et al.</b>             | 2023 | 164 questions about cirrhosis and                    | GPT                                  | Providing answers on cirrhosis and HCC                          | Good accuracy, but not comprehensive                          |

|                         |      |                                                        |                                   |                                                          |                                                                   |
|-------------------------|------|--------------------------------------------------------|-----------------------------------|----------------------------------------------------------|-------------------------------------------------------------------|
|                         |      | hepatocellular carcinoma                               |                                   |                                                          |                                                                   |
| <b>Sherman et al.</b>   | 2024 | 3,134 patients with liver disease                      | NLP                               | Classifying liver disease pathology                      | High predictive values, enabled insights into disease progression |
| <b>Van Vleck et al.</b> | 2019 | 38,575 patients                                        | CLiX clinical NLP engine          | Identifying NAFLD patients and disease progression       | High sensitivity in tracking disease progression                  |
| <b>Sada et al.</b>      | 2016 | 1,138 patients identified from ICD-9 codes             | Automated Retrieval Console (ARC) | Improving identification of hepatocellular cancer        | Enhanced accuracy in HCC case identification                      |
| <b>Pradhan et al.</b>   | 2024 | 22 patients/caregivers and transplant hepatologists    | Multiple LLMs                     | Generating patient educational materials about cirrhosis | Comparable understandability and accuracy to human materials      |
| <b>Schneider et al.</b> | 2023 | 2.15 million pathology and 2.7 million imaging reports | Rule-based NLP algorithm          | Identifying hepatic steatosis                            | Effective detection of undiagnosed cases                          |
